# Supplementary material for: Polymorphism of the β,γ-hydroxylactone derived from indomethacin
Source: Royal Society of Chemistry journal article supplement (doi:10.1039/c2ce26188j), 2012-01-01
Supplement: c2ce26188j.pdf [file c2ce26188j.pdf]

## Supplementary Information for

### Polymorphism of the $\beta,\gamma$ -hydroxylactone derived from indomethacin

Nikoletta B. Báthori\*<sup>a</sup> and Clive L. Oliver\*<sup>b</sup>

<sup>a</sup> Crystal Engineering Research Unit, Department of Chemistry, Cape Peninsula University of Technology, P.O. Box 652, Cape Town, 8000, South Africa. E-mail: [bathorin@cpu.ac.za](mailto:bathorin@cpu.ac.za); Fax: +27 21 460 3854; Tel: +27 21 460 8354

<sup>b</sup> Centre for Supramolecular Chemistry Research, Department of Chemistry, University of Cape Town, South Africa. E-mail: [clive.oliver@uct.ac.za](mailto:clive.oliver@uct.ac.za); Fax: +27 21 650 5419; Tel: +27 21 650 3830

#### 1. Powder X-ray diffraction patterns of the two polymorphs and the in situ prepared form I in bulk.

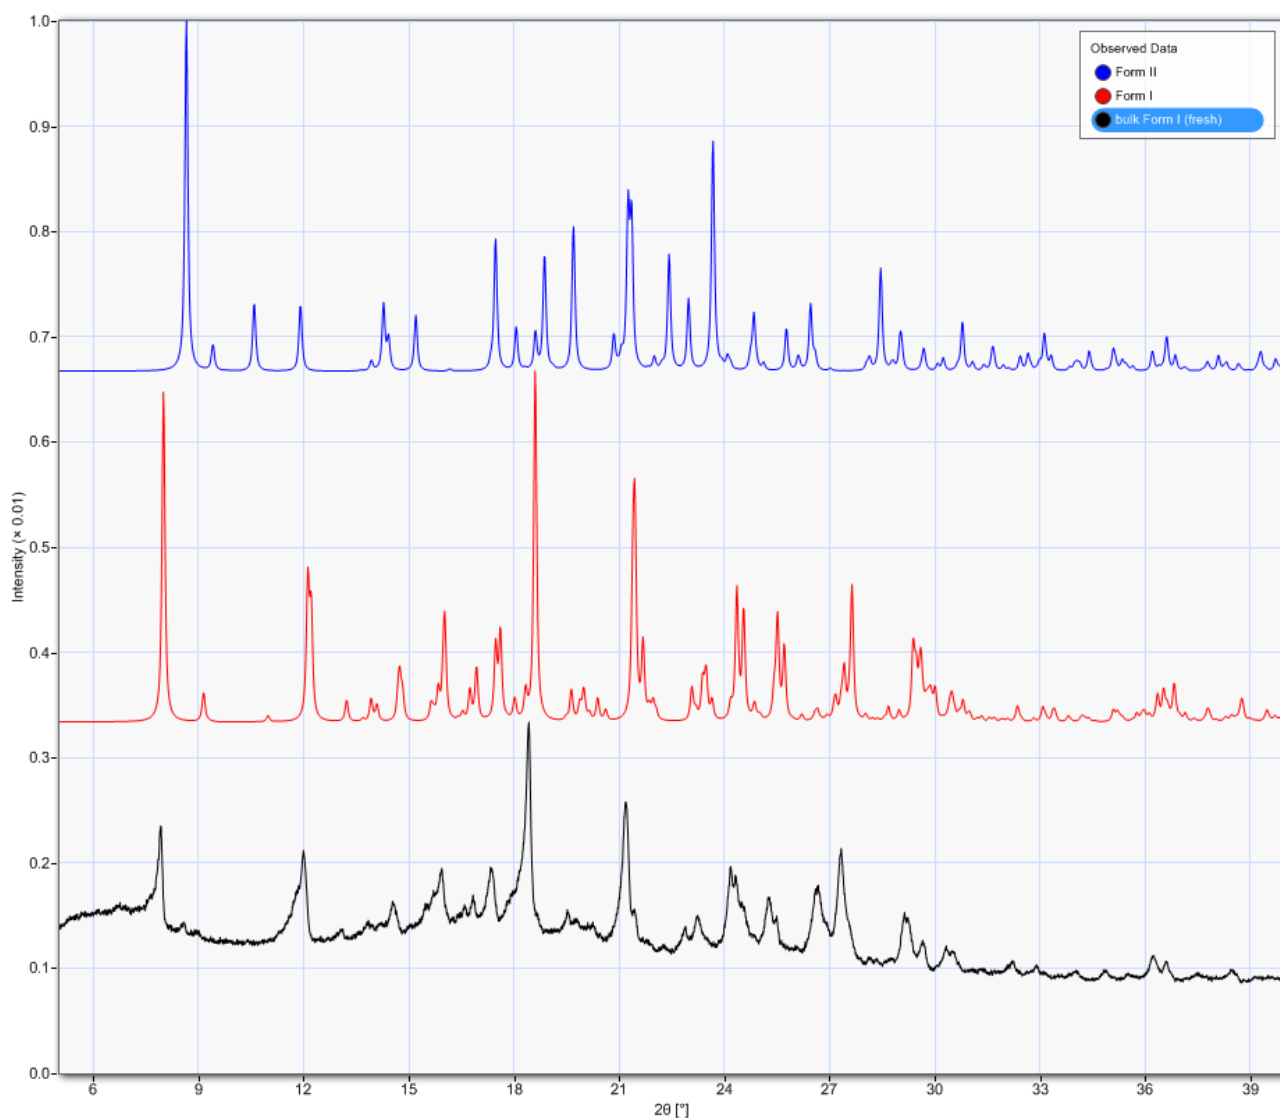

Figure 1S In situ preparation of Form I. Generated powder X-ray patterns of form II (blue), form I (red) and bulk material produced to obtain significant amount of the metastable form (black).

## 2. Differential Scanning Calorimetry

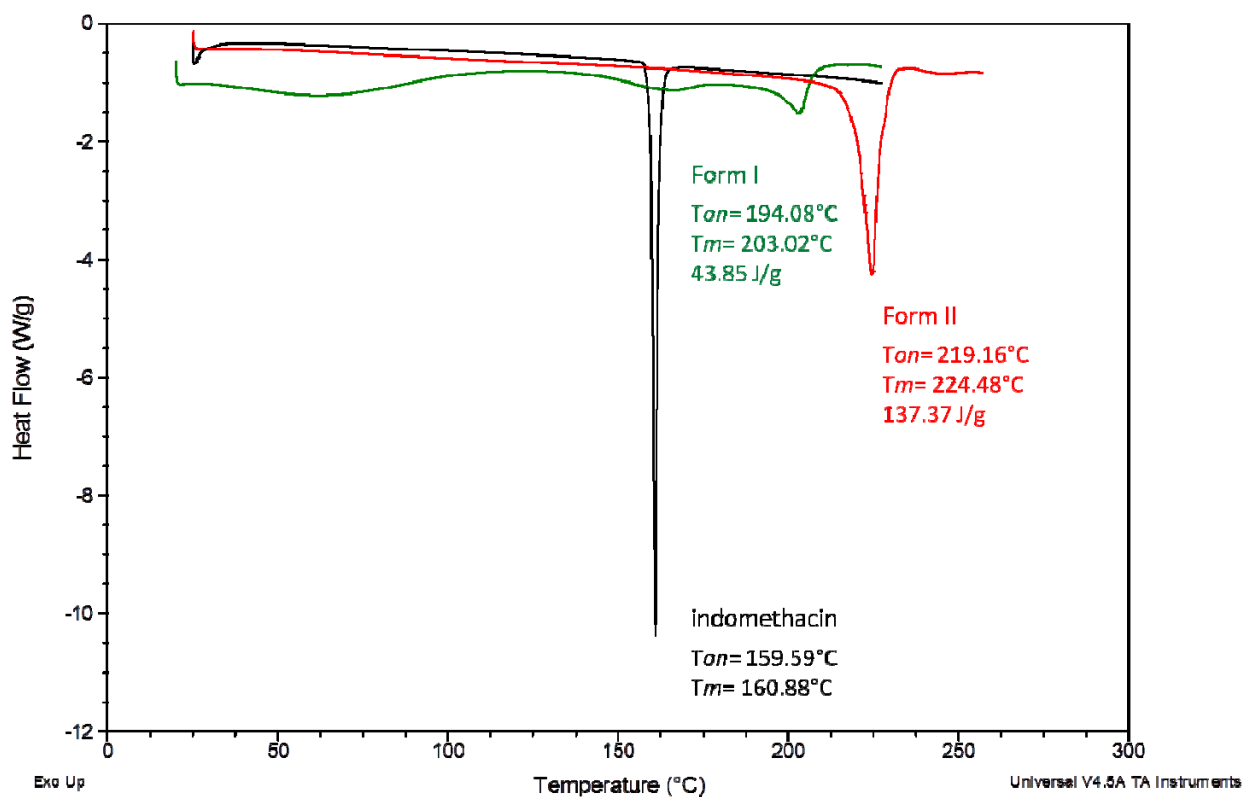

Figure 2S Melting points of  $\gamma$ -Indomethacin, and form I and II.

### 3. Computational chemistry details.

Applied basis set: B3LYP/6-31G\*\*

Table 1S

|                   | colour      | molecule | Energy / kJ mol <sup>-1</sup> |
|-------------------|-------------|----------|-------------------------------|
| 1                 | Red         |          | 0                             |
| 2                 | Orange      |          | 0.73                          |
| 3                 | Cyan        |          | 10.20                         |
| 4                 | Green       |          | 9.63                          |
| 5                 | Magenta     |          | 11.88                         |
| 6                 | Dark gray   |          | 12.61                         |
| 7                 | Light green |          | 19.78                         |
| 8                 | Pink        |          | 19.39                         |
| Crystal structure | Black       |          | -                             |

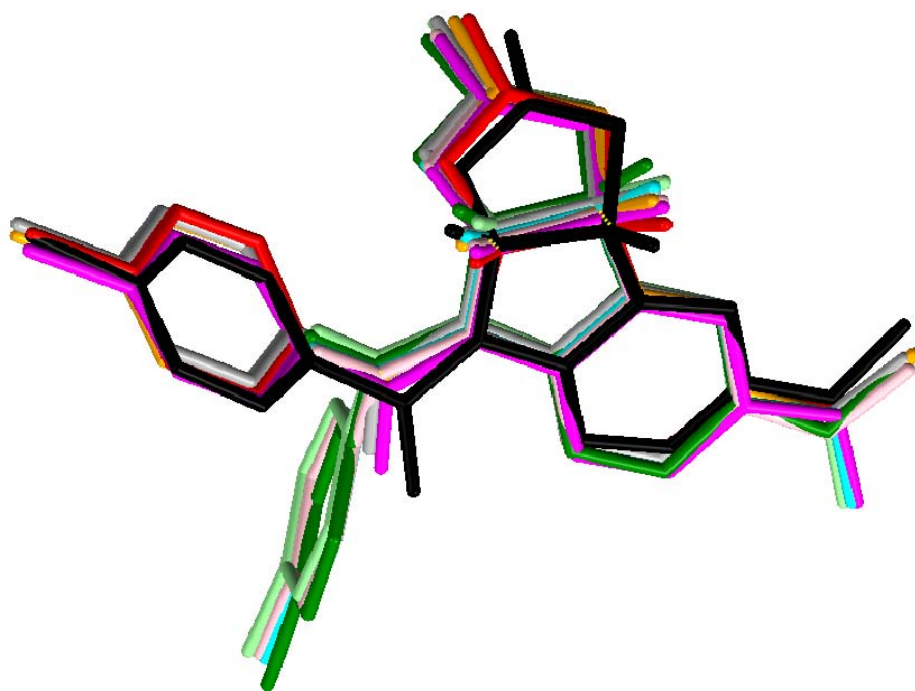

Figure 3S Overlay of the possible conformers.

4. Hydrogen bond pattern and intermolecular potentials in form I and II.

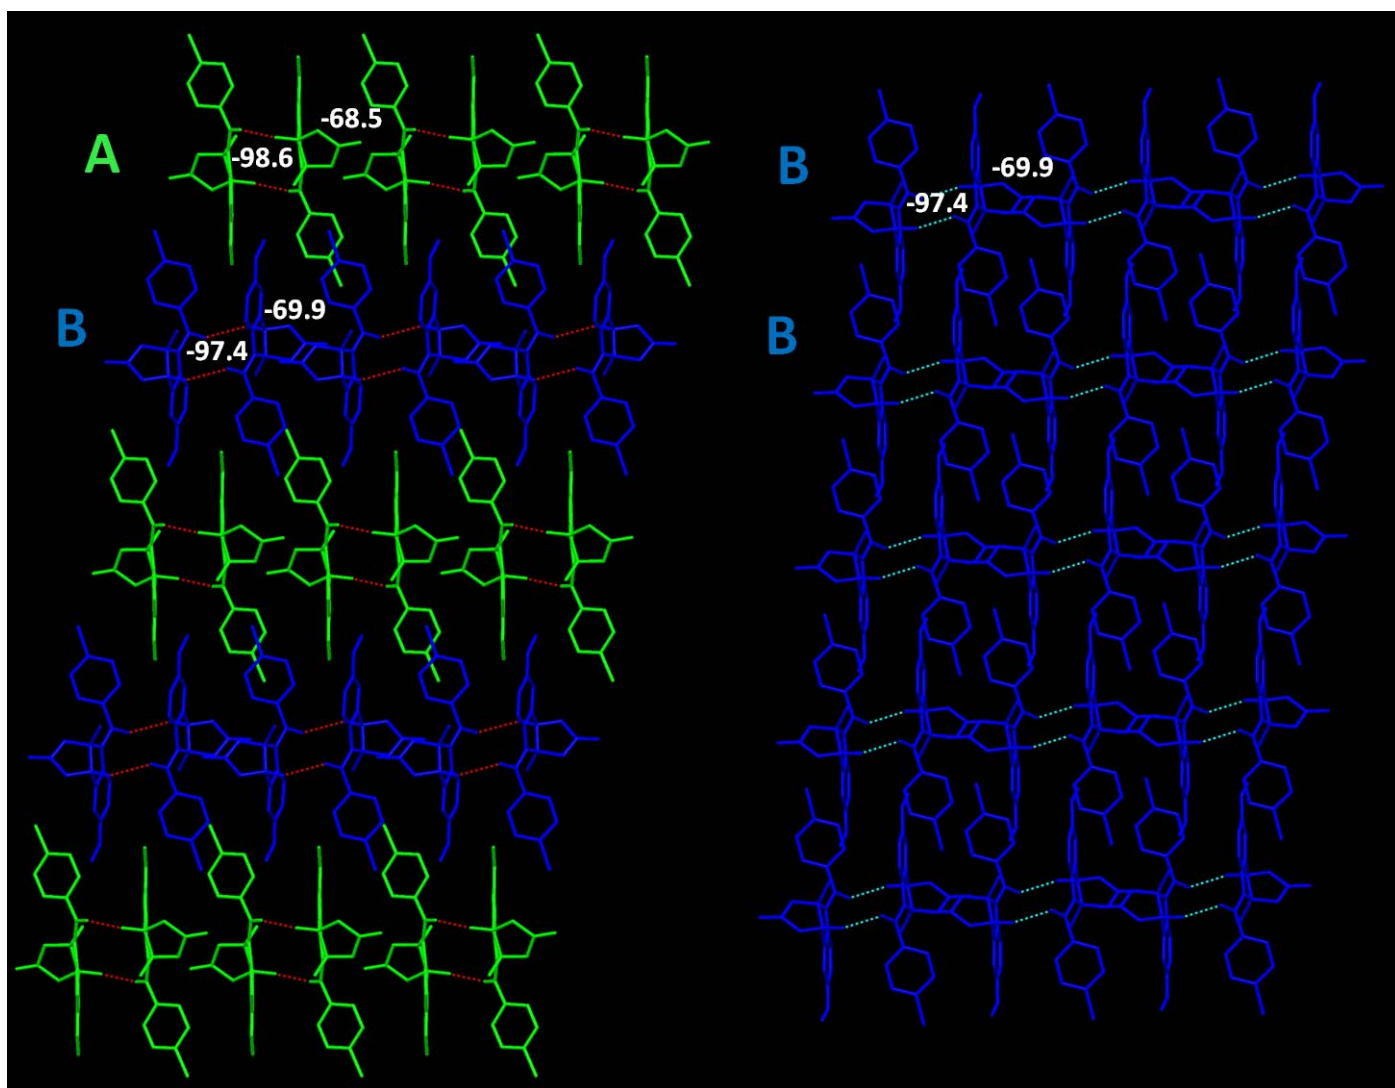

Figure 4S Packing diagrams are showing the hydrogen bond pattern in form I (left) and form II (right). Molecules are coloured by symmetry equivalence are showing the two types of centro-symmetrical dimers (A and B) and the calculated intermolecular potentials ( $\text{kJ mol}^{-1}$ ) between the related molecules.

## 5. Hirshfeld surfaces and fingerprint plots for molecules

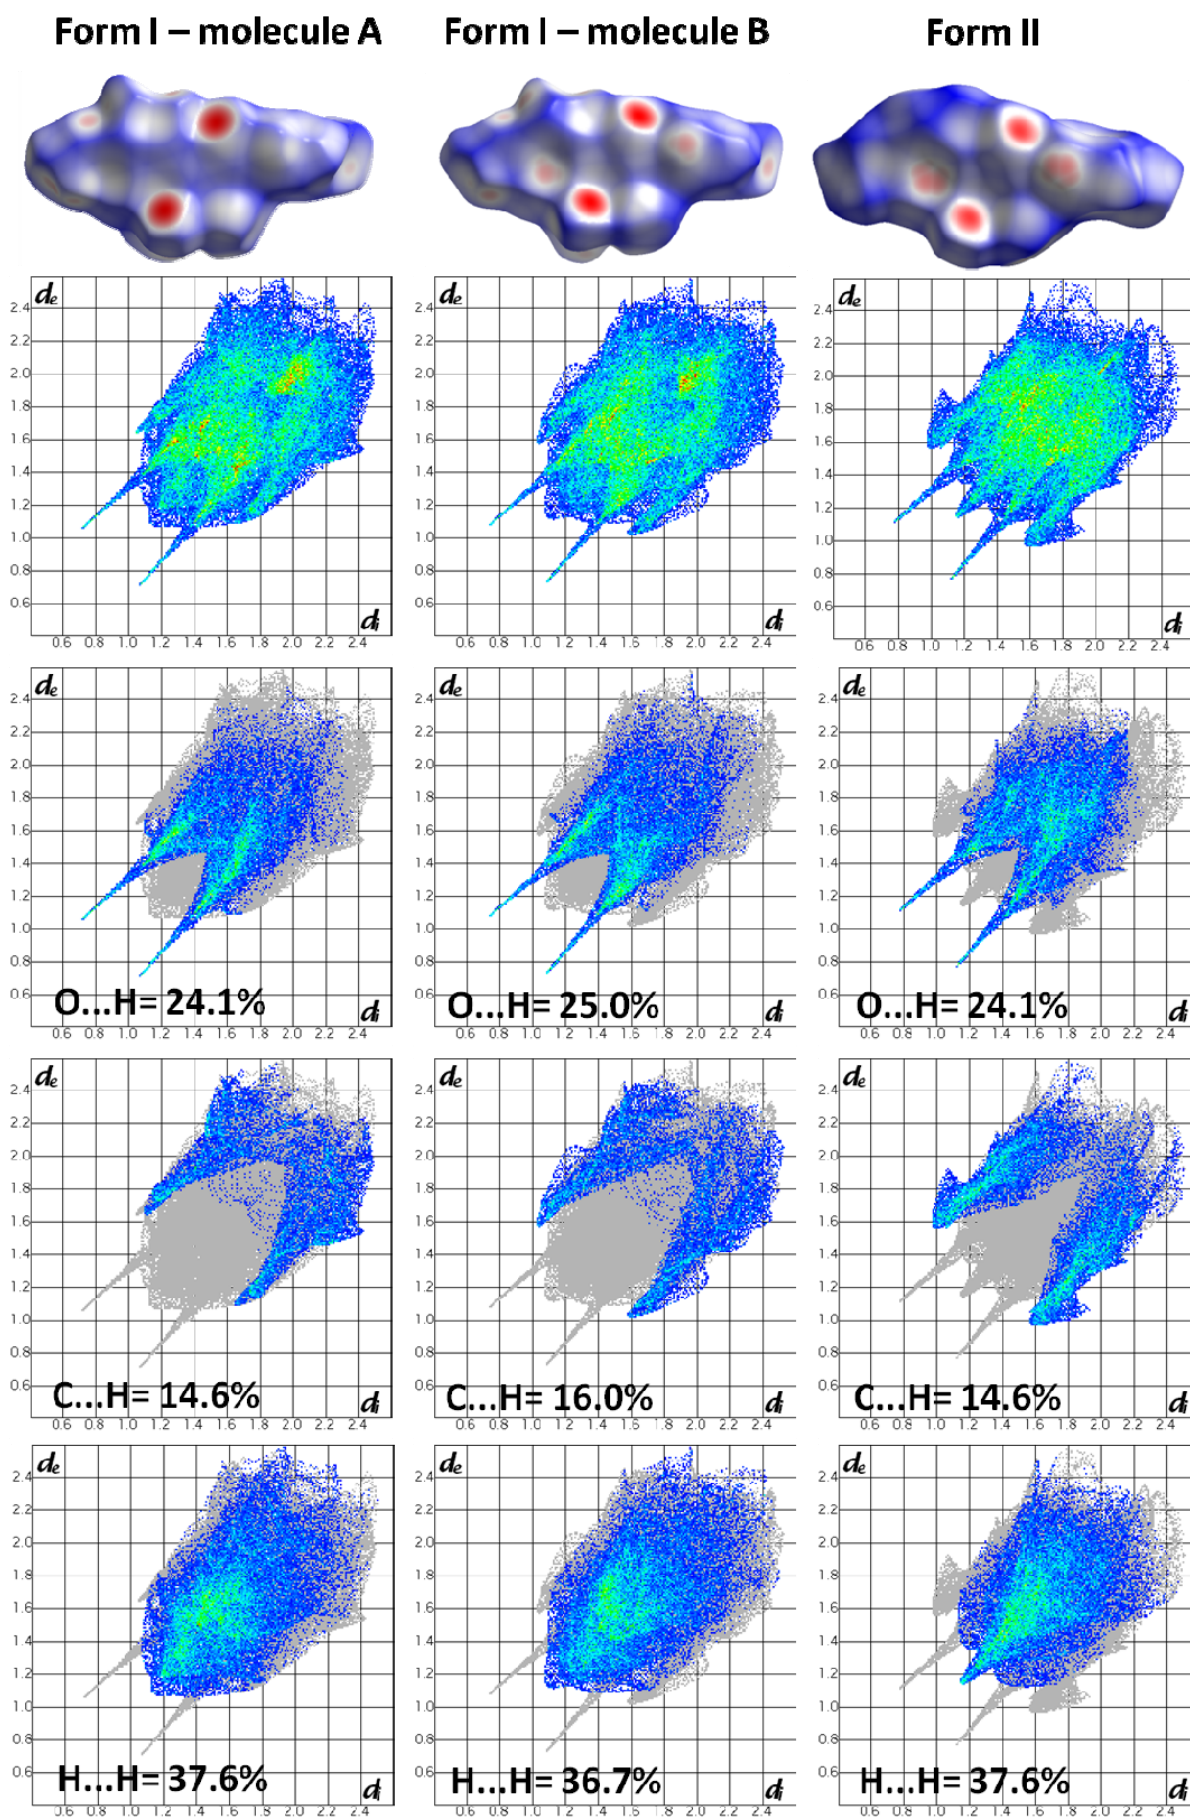

Figure S5 Hirshfeld surfaces and fingerprint plots of molecules in form I and II.

6. Hirshfeld surfaces and fingerprint plots for dimers

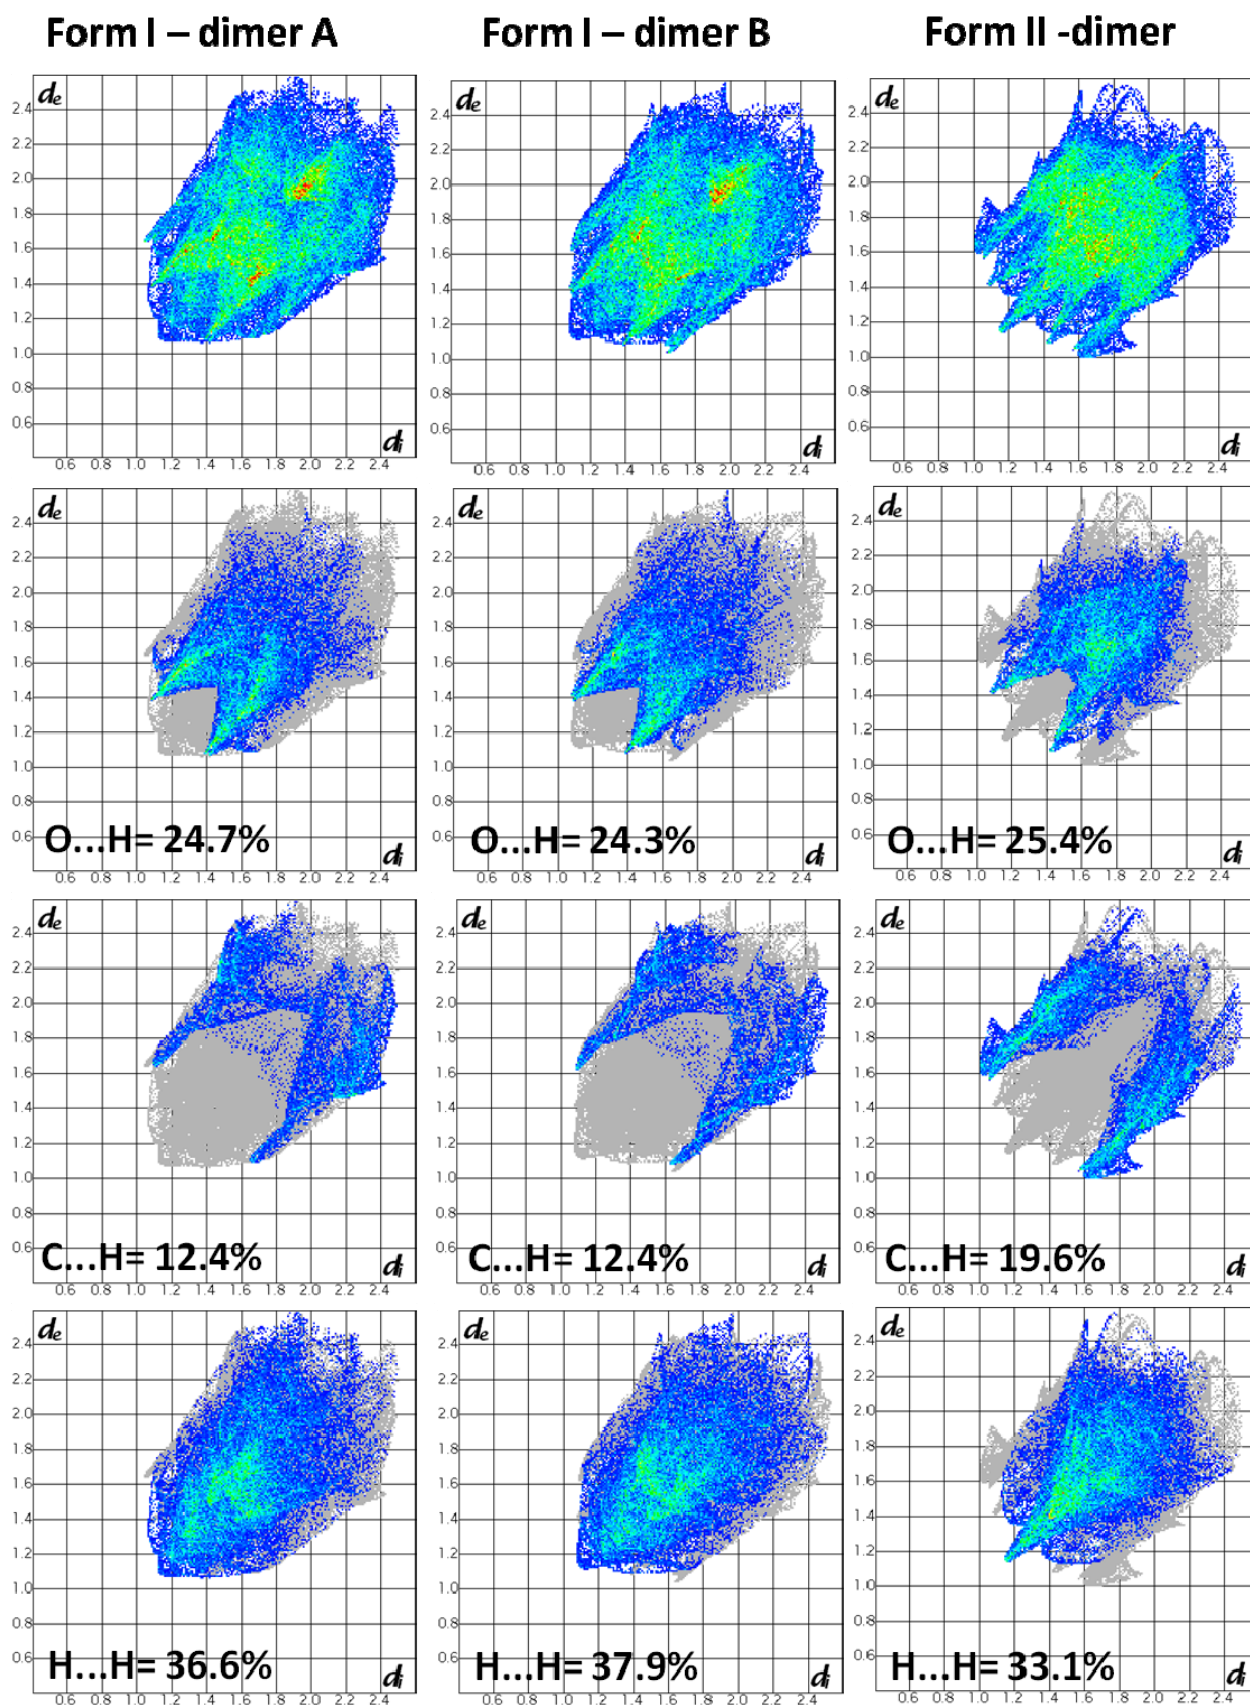

Figure 6S Hirshfeld surfaces and fingerprint plots of dimers in form I and II.
